# Supplementary material for: Effect of Integrating Machine Learning Mortality Estimates With Behavioral Nudges to Clinicians on Serious Illness Conversations Among Patients With Cancer: A Stepped-Wedge Cluster Randomized Clinical Trial
Source: PubMed Central journal article supplement (PMC7563672; doi:10.1001/jamaoncol.2020.4759), 2020-10-15
Supplement: jamaoncol-e204759-s002.pdf [file jamaoncol-e204759-s002.pdf]

## Supplementary Online Content

Manz CR, Parikh RB, Small DS, et al. Effect of integrating machine learning mortality estimates with behavioral nudges to clinicians on serious illness conversations among patients with cancer: a stepped-wedge cluster randomized clinical trial. *JAMA Oncol*. Published online October 15, 2020. doi:10.1001/jamaoncol.2020.4759

**eFigure 1.** Stepped-Wedge Design Overview

**eFigure 2.** Example Clinician Emails by Performance

**eFigure 3.** Serious Illness Conversations for High-Risk Patients by Clinic

**eTable 1.** High-Risk Patient Encounter Characteristics

**eTable 2.** Patient Encounters and SIC Rates by Clinic and Control vs Intervention

**eTable 3.** Regression Table for Serious Illness Conversation Model Including All Patients

**eTable 4.** Regression Table for Serious Illness Conversation Model Including High Risk Patients Only

**eTable 5.** Fully Adjusted Models for Serious Illness Conversations (Sics) for All Patients and for High Risk Patients Only

**eTable 6.** Serious Illness Conversations (Sics) for All Patients, Documented Within 7 Days

**eTable 7.** Serious Illness Conversations (Sics), Adjusted for Clinician Time From SIC Guide Training to Trial Start Date

**eTable 8.** Regression Table for Advance Care Planning Model Including All Patients

**eTable 9.** Regression Table for Advance Care Planning Model Including High Risk Patients Only

**eTable 10.** Fully Adjusted Models for Advance Care Planning (Acps) for All Patients and for High Risk Patients Only

**eTable 11.** Adjusted Change in Advance Care Planning Conversations (Sics), Documented Within 7 days

**eTable 12.** Adjusted Change in Serious Illness Conversations (Sics) and Advanced Care Planning for Non-High-Risk Patients

This supplementary material has been provided by the authors to give readers additional information about their work.

**eFigure 1. Stepped-Wedge Design Overview**

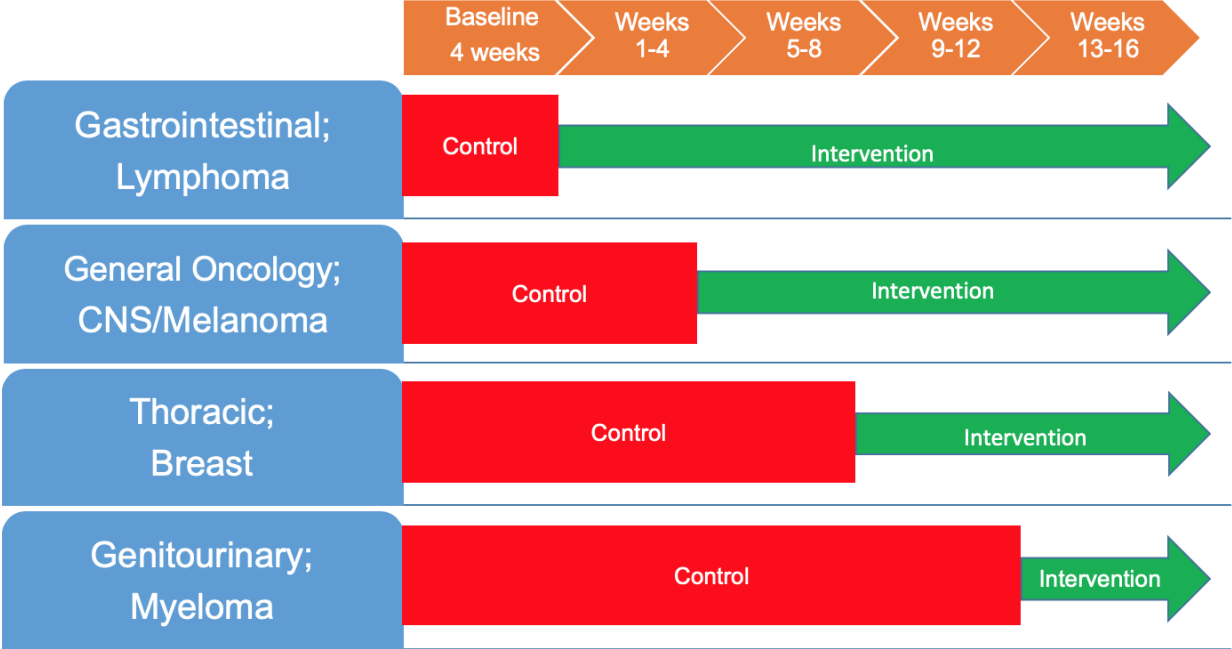

## eFigure 2. Example Clinician Emails by Performance

### a. Email to clinicians who are not in the top 10 clinicians with the most serious illness conversations in the prior four weeks

Next week's high-risk patients for Serious Illness Conversations

---

Thursday, July 18, 2019 at 8:05 AM

[Show Details](#)

---

Dear \_\_\_\_\_ :

The ACC is working to help oncologists have earlier Serious Illness Conversations with patients. In the past four weeks, you have documented **2 conversations**.

18 oncology clinicians have documented more conversations than you during that time.

We have identified patients scheduled to see you next week who may benefit from a Serious Illness Conversation. [Click here](#) to view your list (you must be connected to the UPHS network).

Sincerely,

### b. Email to the 10 clinicians with the most serious illness conversation in the prior four weeks

Next week's high-risk patients for Serious Illness Conversations

---

Thursday, July 25, 2019 at 8:05 AM

[Show Details](#)

---

Dear \_\_\_\_\_

The ACC is working to help oncologists have earlier Serious Illness Conversations with patients. In the past four weeks, you have documented **11 conversations**.

You are among the top performers - keep up the great work!

We have identified patients scheduled to see you next week who may benefit from a Serious Illness Conversation. [Click here](#) to view your list (you must be connected to the UPHS network).

Sincerely,

**eFigure 3. Serious Illness Conversations for High-Risk Patients by Clinic**

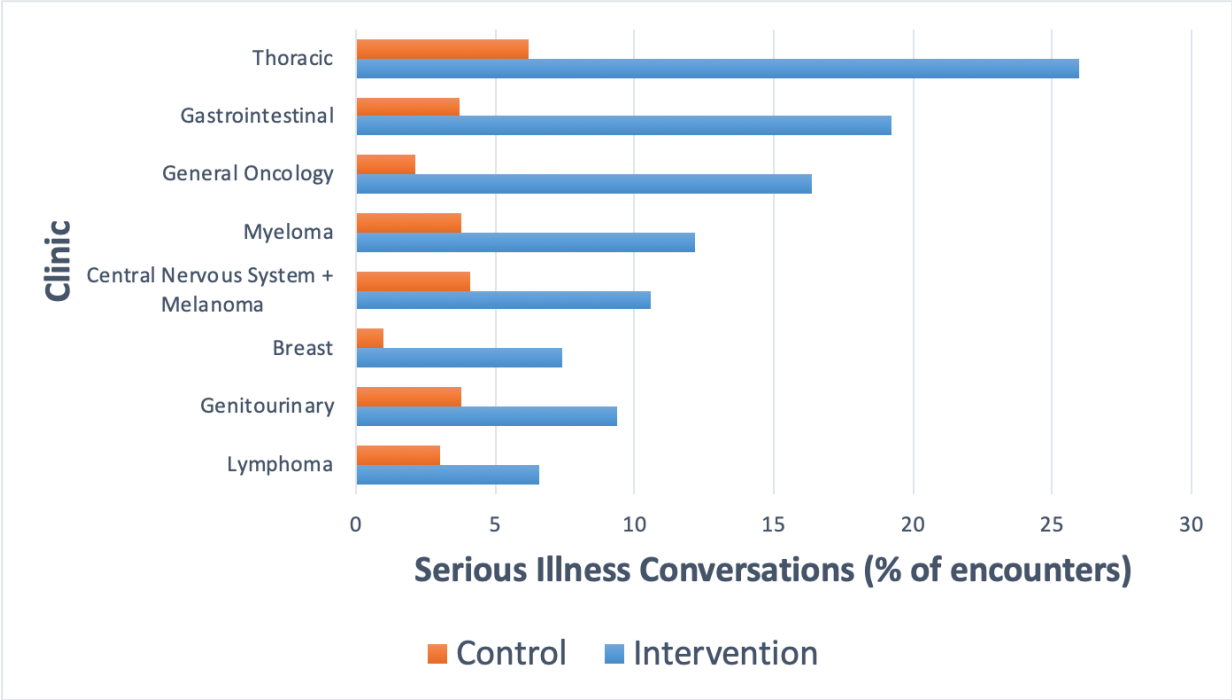

**eTable 1. High-Risk Patient Encounter Characteristics**

| <b>Characteristic</b>                    | <b>Control<br/>(n = 2125)</b> | <b>Intervention<br/>(n = 1999)</b> |
|------------------------------------------|-------------------------------|------------------------------------|
| <b>Sociodemographics</b>                 |                               |                                    |
| Age, Mean (SD)                           | 64.5 (12.7)                   | 64.4 (13)                          |
| Female Gender, No. (%)                   | 1070 (50.4%)                  | 1025 (51.3%)                       |
| Race/Ethnicity, No. (%)                  |                               |                                    |
| White non-Hispanic                       | 1494 (70.3%)                  | 1417 (70.9%)                       |
| Black non-Hispanic                       | 467 (22%)                     | 408 (20.4%)                        |
| Other                                    | 164 (7.7%)                    | 174 (8.7%)                         |
| Insurance, No. (%)                       |                               |                                    |
| Commercial                               | 809 (38.1%)                   | 782 (39.1%)                        |
| Medicare                                 | 1149 (54.1%)                  | 1060 (53%)                         |
| Medicaid                                 | 167 (7.9%)                    | 157 (7.9%)                         |
| <b>Clinic</b>                            |                               |                                    |
| Breast                                   | 311 (14.6%)                   | 204 (10.2%)                        |
| Central Nervous System Tumors + Melanoma | 145 (6.8%)                    | 161 (8.1%)                         |
| Gastrointestinal                         | 136 (6.4%)                    | 527 (26.4%)                        |
| General oncology                         | 292 (13.7%)                   | 415 (20.8%)                        |
| Genitourinary                            | 318 (15%)                     | 64 (3.2%)                          |
| Lymphoma                                 | 67 (3.2%)                     | 272 (13.6%)                        |
| Myeloma                                  | 420 (19.8%)                   | 98 (4.9%)                          |
| Thoracic                                 | 436 (20.5%)                   | 258 (12.9%)                        |
| <b>Clinical</b>                          |                               |                                    |
| Charlson comorbidity index, median (IQR) | 8 (3-9)                       | 8 (3-9)                            |
| Predicted mortality risk, mean (SD)*     | 34% (20-53%)                  | 36% (20-56%)                       |

SD = Standard deviation

IQR = Interquartile range

\* 180-day mortality risk as predicted by mortality prediction algorithm

**eTable 2. Patient Encounters and SIC Rates by Clinic and Control vs Intervention**

| Intervention Assignment             | Number of patient encounters |              | Percent of encounters with SIC (X/Y) |                  |
|-------------------------------------|------------------------------|--------------|--------------------------------------|------------------|
|                                     | Control                      | Intervention | Control                              | Intervention     |
| Breast                              | 2003                         | 1520         | 0.4% (8/2003)                        | 1.6% (25/1520)   |
| Central Nervous System/<br>Melanoma | 762                          | 1188         | 1.4% (11/762)                        | 4.2% (50/1188)   |
| Gastrointestinal                    | 624                          | 2770         | 2.7% (17/624)                        | 8.6% (239/2770)  |
| General oncology                    | 2171                         | 3757         | 1% (21/2171)                         | 3.3% (125/3757)  |
| Genitourinary                       | 1792                         | 451          | 0.7% (13/1792)                       | 2.2% (10/451)    |
| Lymphoma                            | 541                          | 2289         | 0.9% (5/541)                         | 1.8% (42/2289)   |
| Myeloma                             | 2592                         | 707          | 1.2% (32/2592)                       | 2.5% (18/707)    |
| Thoracic                            | 1685                         | 1207         | 2.8% (48/1685)                       | 10.2% (123/1207) |
| <b>Total</b>                        | 12170                        | 13889        | 1.3% (155/12170)                     | 4.6% (632/13889) |

**eTable 3. Regression Table for Serious Illness Conversation Model Including All Patients**

| <b>Variable</b>                   | <b>Estimate</b> | <b>P Value</b> | <b>OR (CI)</b>    |
|-----------------------------------|-----------------|----------------|-------------------|
| <b>Wedge</b>                      |                 |                |                   |
| 10/7/19 – 11/3/19                 | 0.8552          | 0.0002         | 2.35 (1.5-3.69)   |
| 7/15/19 – 8/11/19                 | 0.2788          | 0.1368         | 1.32 (0.92-1.91)  |
| 8/12/19 – 9/8/19                  | 0.5318          | 0.0074         | 1.7 (1.15-2.51)   |
| 9/9/19 – 10/6/19                  | 0.5809          | 0.0203         | 1.79 (1.09-2.92)  |
| <b>Intervention</b>               |                 |                |                   |
| Pre                               | Ref             | -              | Ref               |
| Post                              | 0.7028          | <.0001         | 2.02 (1.44-2.83)  |
| <b>Clinic</b>                     |                 |                |                   |
| Lymphoma                          | Ref             | -              | Ref               |
| Gastrointestinal                  | 1.5814          | 0.0002         | 4.86 (2.14-11.03) |
| Thoracic                          | 1.5448          | 0.0003         | 4.69 (2.02-10.88) |
| Central Nervous System / Melanoma | 0.7444          | 0.0664         | 2.11 (0.95-4.66)  |
| Myeloma                           | 0.2841          | 0.577          | 1.33 (0.49-3.61)  |
| Genitourinary                     | -0.0877         | 0.8423         | 0.92 (0.39-2.17)  |
| General oncology                  | 0.4759          | 0.2153         | 1.61 (0.76-3.42)  |
| Breast                            | -0.3874         | 0.5014         | 0.68 (0.22-2.1)   |

**eTable 4. Regression Table for Serious Illness Conversation Model Including High Risk Patients Only**

| <b>Variable</b>                   | <b>Estimate</b> | <b>P Value</b> | <b>OR (CI)</b>   |
|-----------------------------------|-----------------|----------------|------------------|
| <b>Wedge</b>                      |                 |                |                  |
| 10/7/19 – 11/3/19                 | 1.1016          | <.0001         | 3.01 (1.73-5.22) |
| 7/15/19 – 8/11/19                 | 0.4216          | 0.0794         | 1.52 (0.95-2.44) |
| 8/12/19 – 9/8/19                  | 0.637           | 0.0177         | 1.89 (1.12-3.2)  |
| 9/9/19 – 10/6/19                  | 0.7633          | 0.009          | 2.15 (1.21-3.8)  |
| <b>Intervention</b>               |                 |                |                  |
| Pre                               | Ref             | -              | Ref              |
| Post                              | 1.0011          | <.0001         | 2.72 (1.73-4.28) |
| <b>Clinic</b>                     |                 |                |                  |
| Lymphoma                          | Ref             | -              | Ref              |
| Gastrointestinal                  | 1.1453          | 0.0077         | 3.14 (1.35-7.29) |
| Thoracic                          | 1.2996          | 0.0075         | 3.67 (1.41-9.52) |
| Central Nervous System / Melanoma | 0.4679          | 0.3988         | 1.6 (0.54-4.73)  |
| Myeloma                           | 0.4484          | 0.3251         | 1.57 (0.64-3.82) |
| Genitourinary                     | 0.3504          | 0.487          | 1.42 (0.53-3.81) |
| General oncology                  | 0.7842          | 0.1208         | 2.19 (0.81-5.9)  |
| Breast                            | -0.2734         | 0.5367         | 0.76 (0.32-1.81) |



**eTable 5. Fully Adjusted Models for Serious Illness Conversations (Sics) for All Patients and for High Risk Patients Only**

| <b>Serious Illness Conversation</b> | <b>Control</b>   | <b>Intervention</b> | <b>Adjusted Difference for Intervention Relative to Control, Percentage Points (95% CI)</b> | <b>P Value</b> |
|-------------------------------------|------------------|---------------------|---------------------------------------------------------------------------------------------|----------------|
| <b>All patient encounters</b>       | 1.3% (155/12170) | 4.6% (632/13889)    | 3.3% (2.3-4.5)                                                                              | <.001          |
| <b>Fully Adjusted Model</b>         | -                | -                   | 3.3% (2.3-4.5)                                                                              | <.001          |
| <b>Subgroup analyses</b>            |                  |                     |                                                                                             |                |
| Age                                 |                  |                     |                                                                                             |                |
| 18-35 years                         | 0.4% (3/682)     | 1.2% (12/982)       | -                                                                                           | -              |
| 36-50 years                         | 1% (16/1546)     | 3.2% (64/1998)      | -                                                                                           | -              |
| 51-64 years                         | 1.5% (63/4130)   | 4.8% (221/4619)     | -                                                                                           | -              |
| ≥ 65 years                          | 1.3% (73/5812)   | 5.3% (335/6290)     | -                                                                                           | -              |
| Gender                              |                  |                     |                                                                                             |                |
| Female                              | 1.3% (85/6426)   | 4.1% (312/7576)     | -                                                                                           | -              |
| Male                                | 1.2% (70/5744)   | 5.1% (320/6313)     | -                                                                                           | -              |
| Race/Ethnicity                      |                  |                     |                                                                                             |                |
| White non-Hispanic                  | 1.3% (108/8629)  | 4.5% (435/9709)     | -                                                                                           | -              |
| Black non-Hispanic                  | 1.5% (37/2436)   | 4.6% (128/2772)     | -                                                                                           | -              |
| Other                               | 0.9% (10/1105)   | 4.9% (69/1408)      | -                                                                                           | -              |
| Insurance                           |                  |                     |                                                                                             |                |
| Commercial                          | 1.3% (69/5467)   | 3.5% (230/6522)     | -                                                                                           | -              |
| Medicare                            | 1.3% (80/5953)   | 5.5% (345/6321)     | -                                                                                           | -              |
| Medicaid                            | 0.8% (6/750)     | 5.4% (57/1046)      | -                                                                                           | -              |
| Predicted mortality risk            |                  |                     |                                                                                             |                |
| 0.0 - 0.1                           | 0.3% (26/8247)   | 1.2% (110/9475)     | -                                                                                           | -              |
| >0.1 to 0.2                         | 1.3% (20/1566)   | 6.8% (108/1596)     | -                                                                                           | -              |
| >0.2 to 0.3                         | 2% (13/642)      | 10.2% (73/713)      | -                                                                                           | -              |
| >0.3 to 0.4                         | 3.4% (15/443)    | 13.4% (65/486)      | -                                                                                           | -              |
| >0.4 to 0.5                         | 4.6% (14/303)    | 18.4% (71/385)      | -                                                                                           | -              |
| >0.5                                | 9.2% (62/677)    | 25.1% (183/730)     | -                                                                                           | -              |
| <b>High-risk patient encounters</b> | 3.6% (77/2125)   | 15.2% (304/1999)    | 11.6% (8.2-15.5)                                                                            | <.001          |
| <b>Fully Adjusted Model</b>         | -                | -                   | 11.6% (8.2-15.5)                                                                            | <.001          |
| <b>Subgroup analyses</b>            |                  |                     |                                                                                             |                |
| Age                                 |                  |                     |                                                                                             |                |
| 18-35 years                         | 2.9% (2/70)      | 12.9% (9/70)        | -                                                                                           | -              |
| 36-50 years                         | 3.2% (6/189)     | 13.3% (26/195)      | -                                                                                           | -              |
| 51-64 years                         | 5% (39/775)      | 14.9% (104/696)     | -                                                                                           | -              |

|                    |                |                  |   |   |
|--------------------|----------------|------------------|---|---|
| ≥ 65 years         | 2.7% (30/1091) | 15.9% (165/1038) | - | - |
| Gender             |                |                  |   |   |
| Female             | 3.8% (41/1070) | 15% (154/1025)   | - | - |
| Male               | 3.4% (36/1055) | 15.4% (150/974)  | - | - |
| Race/Ethnicity     |                |                  |   |   |
| White non-Hispanic | 3.9% (58/1494) | 14.2% (201/1417) | - | - |
| Black non-Hispanic | 3.6% (17/467)  | 16.9% (69/408)   | - | - |
| Other              | 1.2% (2/164)   | 19.5% (34/174)   | - | - |
| Insurance          |                |                  |   |   |
| Commercial         | 4.6% (37/809)  | 11.5% (90/782)   | - | - |
| Medicare           | 3.3% (38/1149) | 16.3% (173/1060) | - | - |
| Medicaid           | 1.2% (2/167)   | 26.1% (41/157)   | - | - |

**eTable 6. Serious Illness Conversations (Sics) for All Patients, Documented Within 7 Days**

| <b>Serious Illness Conversation</b> | <b>Control</b>   | <b>Intervention</b> | <b>Adjusted Difference for Intervention Relative to Control, Percentage Points (95% CI)</b> | <b>P Value</b> |
|-------------------------------------|------------------|---------------------|---------------------------------------------------------------------------------------------|----------------|
| <b>All patient encounters</b>       | 0.9% (114/12170) | 3.7% (515/13889)    | 2.8% (1.8-4)                                                                                | <.001          |
| <b>High-risk patient encounters</b> | 2.9% (61/2125)   | 12.2% (243/1999)    | 9.3% (6-13.1)                                                                               | <.001          |

**eTable 7. Serious Illness Conversations (Sics), Adjusted for Clinician Time From SIC Guide Training to Trial Start Date**

|                                                             | Odds Ratio | 95% Confidence Interval | P value |
|-------------------------------------------------------------|------------|-------------------------|---------|
| SICs, all patients: main model                              | 2.02       | 1.44-2.83               | <.001   |
| Sensitivity model: main model + training interval variable* | 2.03       | 1.44-2.85               | <.001   |
| SICs, high risk patients: main model                        | 2.72       | 1.73-4.28               | <.001   |
| Sensitivity model: main model + training interval variable  | 2.74       | 1.74-4.31               | <.001   |

\* Training interval variable is the clinician-level time from Serious Illness Conversation Guide Training to the start date of the trial

**eTable 8. Regression Table for Advance Care Planning Model Including All Patients**

| <b>Variable</b>                   | <b>Estimate</b> | <b>P Value</b> | <b>OR (CI)</b>    |
|-----------------------------------|-----------------|----------------|-------------------|
| <b>Wedge</b>                      |                 |                |                   |
| 10/7/19 – 11/3/19                 | 0.7919          | <.0001         | 2.21 (1.6-3.04)   |
| 7/15/19 – 8/11/19                 | 0.2555          | 0.0201         | 1.29 (1.04-1.6)   |
| 8/12/19 – 9/8/19                  | 0.6287          | <.0001         | 1.88 (1.41-2.5)   |
| 9/9/19 – 10/6/19                  | 0.6313          | 0.0002         | 1.88 (1.34-2.63)  |
| <b>Intervention</b>               |                 |                |                   |
| Pre                               | Ref             | -              | Ref               |
| Post                              | 0.3603          | 0.001          | 1.43 (1.16-1.78)  |
| <b>Clinic</b>                     |                 |                |                   |
| Lymphoma                          | Ref             | -              | Ref               |
| Gastrointestinal                  | 1.5608          | <.0001         | 4.76 (2.23-10.15) |
| Thoracic                          | 1.5699          | 0.0001         | 4.81 (2.17-10.63) |
| Central Nervous System / Melanoma | 0.6904          | 0.0732         | 1.99 (0.94-4.24)  |
| Myeloma                           | 0.0772          | 0.8776         | 1.08 (0.4-2.89)   |
| Genitourinary                     | -0.2742         | 0.5272         | 0.76 (0.32-1.78)  |
| General oncology                  | 0.431           | 0.2301         | 1.54 (0.76-3.11)  |
| Breast                            | -0.4974         | 0.3698         | 0.61 (0.21-1.8)   |

**eTable 9. Regression Table for Advance Care Planning Model Including High Risk Patients Only**

| Variable                          | Estimate | P Value | OR (CI)           |
|-----------------------------------|----------|---------|-------------------|
| <b>Wedge</b>                      |          |         |                   |
| 10/7/19 – 11/3/19                 | 0.9919   | 0.0001  | 2.7 (1.63-4.46)   |
| 7/15/19 – 8/11/19                 | 0.3681   | 0.0626  | 1.44 (0.98-2.13)  |
| 8/12/19 – 9/8/19                  | 0.7603   | 0.0033  | 2.14 (1.29-3.55)  |
| 9/9/19 – 10/6/19                  | 0.7732   | 0.0023  | 2.17 (1.32-3.57)  |
| <b>Intervention</b>               |          |         |                   |
| Pre                               | Ref      | -       | Ref               |
| Post                              | 0.6889   | <.0001  | 1.99 (1.43-2.78)  |
| <b>Clinic</b>                     |          |         |                   |
| Lymphoma                          | Ref      | -       | Ref               |
| Gastrointestinal                  | 1.0697   | 0.0101  | 2.91 (1.29-6.59)  |
| Thoracic                          | 1.3665   | 0.0045  | 3.92 (1.53-10.07) |
| Central Nervous System / Melanoma | 0.4808   | 0.3259  | 1.62 (0.62-4.22)  |
| Myeloma                           | 0.1775   | 0.7052  | 1.19 (0.48-3)     |
| Genitourinary                     | 0.1164   | 0.8312  | 1.12 (0.39-3.28)  |
| General oncology                  | 0.7487   | 0.1465  | 2.11 (0.77-5.81)  |
| Breast                            | -0.3233  | 0.5029  | 0.72 (0.28-1.86)  |

**eTable 10. Fully Adjusted Models for Advance Care Planning (Acps) for All Patients and for High Risk Patients Only**

| <b>Advanced Care Planning</b>       | <b>Control</b>   | <b>Intervention</b> | <b>Adjusted Difference for Intervention Relative to Control, Percentage Points (95% CI)</b> | <b>P Value</b> |
|-------------------------------------|------------------|---------------------|---------------------------------------------------------------------------------------------|----------------|
| <b>All patient encounters</b>       | 1.9% (231/12170) | 4.9% (680/13889)    | 3% (2.1-4.1)                                                                                | .001           |
| <b>Fully Adjusted Model</b>         | -                | -                   | 3% (2.1-4.1)                                                                                | <.001          |
| <b>Subgroup analyses</b>            |                  |                     |                                                                                             |                |
| Age                                 |                  |                     |                                                                                             |                |
| 18-35 years                         | 0.4% (3/682)     | 1.3% (13/982)       | -                                                                                           | -              |
| 36-50 years                         | 1.6% (25/1546)   | 3.3% (65/1998)      | -                                                                                           | -              |
| 51-64 years                         | 2.2% (91/4130)   | 5.1% (237/4619)     | -                                                                                           | -              |
| ≥ 65 years                          | 1.9% (112/5812)  | 5.8% (365/6290)     | -                                                                                           | -              |
| Gender                              |                  |                     |                                                                                             |                |
| Female                              | 1.9% (120/6426)  | 4.5% (340/7576)     | -                                                                                           | -              |
| Male                                | 1.9% (111/5744)  | 5.4% (340/6313)     | -                                                                                           | -              |
| Race/Ethnicity                      |                  |                     |                                                                                             |                |
| White non-Hispanic                  | 1.9% (162/8629)  | 4.8% (464/9709)     | -                                                                                           | -              |
| Black non-Hispanic                  | 2% (48/2436)     | 5% (139/2772)       | -                                                                                           | -              |
| Other                               | 1.9% (21/1105)   | 5.5% (77/1408)      | -                                                                                           | -              |
| Insurance                           |                  |                     |                                                                                             |                |
| Commercial                          | 1.8% (101/5467)  | 3.9% (253/6522)     | -                                                                                           | -              |
| Medicare                            | 2% (121/5953)    | 5.8% (369/6321)     | -                                                                                           | -              |
| Medicaid                            | 1.2% (9/750)     | 5.5% (58/1046)      | -                                                                                           | -              |
| Predicted mortality risk            |                  |                     |                                                                                             |                |
| 0.0 - 0.1                           | 0.4% (33/8247)   | 1.2% (118/9475)     | -                                                                                           | -              |
| >0.1 to 0.2                         | 2.2% (34/1566)   | 7.1% (113/1596)     | -                                                                                           | -              |
| >0.2 to 0.3                         | 4% (26/642)      | 11.2% (80/713)      | -                                                                                           | -              |
| >0.3 to 0.4                         | 5.4% (24/443)    | 14% (68/486)        | -                                                                                           | -              |
| >0.4 to 0.5                         | 6.6% (20/303)    | 20.5% (79/385)      | -                                                                                           | -              |
| >0.5                                | 13.1% (89/677)   | 27.4% (200/730)     | -                                                                                           | -              |
| <b>High-risk patient encounters</b> |                  |                     |                                                                                             |                |
|                                     | 5.8% (124/2125)  | 17.5% (350/1999)    | 11.7% (8.4-15.7)                                                                            | <.001          |
| <b>Fully Adjusted Model</b>         | -                | -                   | 11.7% (8.4-15.7)                                                                            | <.001          |
| <b>Subgroup analyses</b>            |                  |                     |                                                                                             |                |
| Age                                 |                  |                     |                                                                                             |                |
| 18-35 years                         | 2.9% (2/70)      | 12.9% (9/70)        | -                                                                                           | -              |
| 36-50 years                         | 6.3% (12/189)    | 15.4% (30/195)      | -                                                                                           | -              |
| 51-64 years                         | 7% (54/775)      | 17% (118/696)       | -                                                                                           | -              |

|                    |                |                  |   |   |
|--------------------|----------------|------------------|---|---|
| ≥ 65 years         | 5.1% (56/1091) | 18.6% (193/1038) | - | - |
| Gender             |                |                  |   |   |
| Female             | 5.9% (63/1070) | 17.5% (179/1025) | - | - |
| Male               | 5.8% (61/1055) | 17.6% (171/974)  | - | - |
| Race/Ethnicity     |                |                  |   |   |
| White non-Hispanic | 6.2% (93/1494) | 16.3% (231/1417) | - | - |
| Black non-Hispanic | 4.7% (22/467)  | 19.6% (80/408)   | - | - |
| Other              | 5.5% (9/164)   | 22.4% (39/174)   | - | - |
| Insurance          |                |                  |   |   |
| Commercial         | 6.7% (54/809)  | 14.3% (112/782)  | - | - |
| Medicare           | 5.7% (66/1149) | 18.5% (196/1060) | - | - |
| Medicaid           | 2.4% (4/167)   | 26.8% (42/157)   | - | - |



**eTable 11. Adjusted Change in Advance Care Planning Conversations (Sics), Documented Within 7 days**

| <b>Advanced Care Planning</b>       | <b>Control</b> | <b>Intervention</b> | <b>Adjusted Difference for Intervention Relative to Control, Percentage Points (95% CI)</b> | <b>P Value</b> |
|-------------------------------------|----------------|---------------------|---------------------------------------------------------------------------------------------|----------------|
| <b>All patient encounters</b>       | 1% (120/12170) | 3.7% (515/13889)    | 2.7% (1.7-3.9)                                                                              | 0.0001         |
| <b>High-risk patient encounters</b> | 3.1% (66/2125) | 12.4% (247/1999)    | 9.3% (6-13.1)                                                                               | <.0001         |

**eTable 12. Adjusted Change in Serious Illness Conversations (Sics) and Advanced Care Planning for Non-High-Risk Patients**

| <b>Outcome</b>                                                         | <b>Control</b>   | <b>Intervention</b> | <b>Adjusted Difference for Intervention Relative to Control, Percentage Points (95% CI)<sup>a</sup></b> | <b>P Value</b> |
|------------------------------------------------------------------------|------------------|---------------------|---------------------------------------------------------------------------------------------------------|----------------|
| <b>Non high-risk patient encounters: Serious Illness Conversations</b> | 0.7% (76/10298)  | 2.5% (300/12130)    | 1.8% (1.0-2.7)                                                                                          | 0.0524         |
| <b>Non high-risk patient encounters: Advance Care Planning</b>         | 1.1% (117/10298) | 2.8% (339/12130)    | 1.7% (0.9-2.5)                                                                                          | 0.35           |

<sup>a</sup> This post-hoc analysis was performed using the same model used in the primary and secondary outcomes reported in the manuscript.
